# Supplementary material for: Spermidine Attenuates High Glucose-Induced Oxidative Damage in Retinal Pigment Epithelial Cells by Inhibiting Production of ROS and NF-κB/NLRP3 Inflammasome Pathway
Source: MDPI journal article supplement (doi:10.3390/ijms241310550), 2023-06-23
Supplement: s1 [file s1]

## Supplementary information

**Table S1. List of antibodies**

| Primary antibody                                   | Dilution | Source | Manufacturer             | Catalog No. |
|----------------------------------------------------|----------|--------|--------------------------|-------------|
| <b>Pro-IL-1<math>\beta</math></b>                  | 1:1000   | rabbit | Santa Cruz               | sc-7884     |
| <b>IL-1<math>\beta</math></b>                      | 1:1000   | rabbit | Santa Cruz               | sc-7884     |
| <b>IL-18</b>                                       | 1:1000   | rabbit | Abcam                    | ab71495     |
| <b>NF-<math>\kappa</math>B</b>                     | 1:1000   | mouse  | Cell signaling           | 6956P       |
| <b>p-I<math>\kappa</math>B-<math>\alpha</math></b> | 1:1000   | mouse  | Thermo Fisher Scientific | MA5-15224   |
| <b>I<math>\kappa</math>B-<math>\alpha</math></b>   | 1:1000   | mouse  | Abcam                    | ab97783     |
| <b>TXNIP</b>                                       | 1:1000   | rabbit | Abcam                    | ab188865    |
| <b>NLRP3</b>                                       | 1:1000   | rabbit | Abcam                    | Ab263899    |
| <b>Cleaved-caspase-1</b>                           | 1:1000   | rabbit | Santa Cruz               | sc-622      |
| <b>ASC</b>                                         | 1:1000   | rabbit | Thermo Fisher Scientific | 10500-1-AP  |
| <b>Lamin B1</b>                                    | 1:1000   | goat   | Santa Cruz               | sc-6216     |
| <b><math>\beta</math>-actin</b>                    | 1:1000   | mouse  | BioWorld                 | BS6007M     |
